# Supplementary material for: Acceptability of external control-arm use in nononcology health technology assessment submissions
Source: Atypon-hosted journal article supplement (doi:10.57264/cer-2025-0073), 2025-12-12
Supplement: supplementary materials.docx [file supplementary%20materials.docx]

# Supplemental Material

**Title: Acceptability of external control-arm use in non-oncology health technology assessment submissions**

***Précis***:Alignment with expert payer insight and published guidance can enhance acceptability of external control-arm use in health technology assessment submissions

We reviewed real-world evidence (RWE) guidance documents from health technology assessment (HTA) agencies in the United Kingdom (UK), France, and Germany, and summarized the key messages. Documents comprised: (1) NICE real-world evidence framework (published 23 June 2022); (2) HAS Methodological Guide: Real-world studies for the assessment of medicinal products and medical devices (published 10 June 2021); and (3) IQWiG General Methods V6.1 (published 24 January 2022). The following table organizes key messages from the NICE and HAS documents; we summarize IQWiG guidance separately below.

|  | **UK** | **France** |
| --- | --- | --- |
| Data suitability | NICE does not define minimum standard for data suitability beyond data use per national laws and regulations. Data source acceptability will depend on use and contextual factors. | HAS recommends using existing data sources for real-world studies, particularly French sources. Data sources can include secondary data (eg, French or international sources) or primary data (ie, a new data collection). |
| Data selection | Developers should identify data sources using a systematic, transparent, and reproducible search, which may include use of registries. Developers should also justify data source selection, ensuring appropriate data provenance and research-question fit. | When selecting a data source for a real-world study, developers should ensure that the source addresses the study’s objectives, contains all measures of interest, is accessible and of quality (eg, accurate and representative of reality), and provides sufficient transparency regarding funding source. |
| Data quality | Developers should ensure that data provide information regarding population, care settings, geography, and time progression. Developers should also assess data completeness (ie, the percentage of records without missing data) and data accuracy (ie, how closely data resemble reality). | HAS considers quality data an essential prerequisite for assessment. Developers should: (1) document the representativeness of study centers, investigators, and participating patients; (2) ensure adequate data monitoring and quality control; and (3) compare characteristics of participating centers with those of non-participating centers. |
| Data provenance | Original data collections (eg, patient health records) and curated data sources (eg, retrospective chart reviews) represent common sources of non-interventional RWD. NICE prefers data that relate directly to the UK population and current standards of care within the National Health Service (NHS). NICE recognizes the potential value of international data, especially for interventions that become available in other countries before marketing authorization in the UK. | For descriptive, real-world studies, HAS allows primary collection or secondary use of data, depending on the question asked and the availability of data. HAS also provides detailed information regarding use of the French Health Data Hub and the SNDS dataset. |
| Data missingness | Developers should compare: (1) patterns of missingness across groups and time; and (2) causes of missingness, assessing whether causes are related to outcomes.  If the amount of missing data is minimal and random, a complete records analysis will be sufficient to address missing data; otherwise, developers should employ advanced methods to address missing data. | HAS allows multiple imputation of missing data for infrequent and random missingness. For systematic missingness, HAS recommends that developers conduct sensitivity analyses. |
| Methodology | NICE provides methodological details, such as how to: (1) minimize bias at the study design and analysis stages; (2) replicate the target trial; and (3) identify confounders.  NICE recommends trial emulation when preparing an RWE study. NICE also recommends early engagement to optimally calibrate the study methodology. | HAS provides methodological details, such as how to: (1) minimize bias at the study design and analysis stages; (2) identify confounders (including time-varying confounders); and (3) outline assumptions on causal relationships.  HAS also focuses on the use of outcome measures based on patient-collected data (or “patient-reported outcome measures”), particularly quality of life. |
| Limitations | Developers should employ sensitivity analyses to assess bias and uncertainty in analytical decision-making. Developers should also use methods such as stratification or matching to address baseline confounding. | In the absence of randomization, HAS recommends the use of measures to minimize indication bias. HAS focuses on the use of causal inference methods in observational contexts (when appropriate), such as adjustment, matching, or weighting. |
| Reporting | Developers should use NICE-provided reporting checklists for observational and comparative effectiveness studies (eg, EQUATOR network, STROBE guidelines, RECORD, RECORD-PE, and START-RWE tool). | HAS does not provide reporting details for RWE studies. HAS refers developers to international references for drafting results reports, such as the STROBE guidelines. |
| Supporting documents | Developers should refer to Technical Support Documents (TSDs), such as NICE TSD 17 (statistical methods for analyzing observational data), TSD 18 (methods for unanchored indirect comparisons with aggregated data), and the NICE Decision Support Unit 2020 (the use of external comparators). | Because HAS represents a key supporter of the European Network for Health Technologies Assessment (EUnetHTA) and the DARWIN EU network, developers should reference EU-focused regulatory initiatives, methodological tools and documents, and European Medicines Agency guidelines for guidance. HAS also recommends use of the Registry Evaluation and Quality Standards (REQueST) tool for assessing the quality of registries accessible online. |
| Acceptance of external comparators | NICE recognizes that external comparators (ECs) can be used to supplement internal or concurrent controls in RCTs but carry a high risk of bias. NICE provides some detail on data use, EC study design, and bias mitigation. | HAS guidance provides no detail regarding how to perform external comparator studies, but hyperlinks resources covering observational comparative effectiveness research. |

EU indicates European Union; IQWiG, German Institute for Quality and Efficiency in Healthcare (IQWiG); NAS, National Authority for Health (in France); NICE, National Institute for Health and Care Excellence; RCT, randomized controlled trial; RWD, real-world data; RWE, real-world evidence; SNDS, Système National des Données de Santé; UK, United Kingdom.

**Germany**

IQWiGdoes not provide RWE development guidance, concluding that study types other than RCTs are usually not suited to demonstrate causality. As a rule, IQWiG only considers RCTs in drug-benefit assessment and uses non-randomized interventional or observational studies only in justified, exceptional cases (eg, the non-feasibility of an RCT).

IQWiG disapproves of the use of non-adjusted indirect comparisons (ie, the naïve use of single-study arms). However, a press release from 2020 recognizes that evidence available at the time of market access may be insufficient and thus allows the use of routine practice data in early drug-benefit assessments. Only data collected specifically for the study, or data collected from a patient registry, are considered acceptable. Existing patient registries may be acceptable depending on the registry and research question. Moreover, in terms of comparative studies without randomization, IQWiG considers conclusions drawn from the observed effects of an intervention to be meaningful only if a certain effect size is exceeded (ie, the presence of a dramatic effect).
